# Supplementary material for: Copper depletion inhibits CoCl2-induced aggressive phenotype of MCF-7 cells via downregulation of HIF-1 and inhibition of Snail/Twist-mediated epithelial-mesenchymal transition
Source: PubMed Central journal article supplement (PMC4502431; doi:10.1038/srep12410), 2015-07-15
Supplement: srep12410-s1.pdf [file srep12410-s1.pdf]

**Copper depletion inhibits CoCl<sub>2</sub>-induced aggressive phenotype of  
MCF-7 cells via downregulation of HIF-1 and inhibition of  
Snail/Twist-mediated epithelial-mesenchymal transition**

Shun Li <sup>1</sup>, Jing Zhang <sup>1</sup>, Hong Yang <sup>1,2</sup>, Chunhui Wu <sup>1,2</sup>, Xitong Dang <sup>3</sup>, Yiyao Liu <sup>1,2\*</sup>

<sup>1</sup> *Department of Biophysics, School of Life Science and Technology,* <sup>2</sup> *Center for Information in Biomedicine, University of Electronic Science and Technology of China, Chengdu 610054, Sichuan, P.R. China.* <sup>3</sup> *Division of Trauma, Surgical Critical Care and Burns, University of California San Diego, CA 92103, USA.*

**Table S1. Primer sequences for real time-PCR analysis**

| Gene        | Primer sequence (5'→3')                                             |
|-------------|---------------------------------------------------------------------|
| β-actin     | Forward: GGCATCCTCACCCCTGAAGTA<br>Reverse: GGGGTGTTGAAGGTCTCAA      |
| vimentin    | Forward: CTCCGGGAGAAATTGCAGGA<br>Reverse: TTCAAGGTCAAGACGTGCCA      |
| VEGFa       | Forward: GGCTTTTCTGTGGCAAGAGGTT<br>Reverse: CGCTGATGTTTGCTCAAGTGGTC |
| fibronectin | Forward: GACCTATCCAAGCTCAAGTGGT<br>Reverse: ATCCAAGGTTTCTGGGTGGG    |
| Snail       | Forward: TGCCCTCAAGATGCACATCCGA<br>Reverse: GGGACAGGAGAAGGGCTTCTC   |
| Twist1      | Forward: GCCAGGTACATCGACTTCCTCT<br>Reverse: TCCATCCTCCAGACCGAGAAGG  |

**Sequences used for *Ctrl* silence**

Primer sequence (5'→3') : GGAAGAAGGCAGUGGUAGUdTdT

Quantitative analysis of immunofluorescence data with CoCl<sub>2</sub> or TEPA treatment.

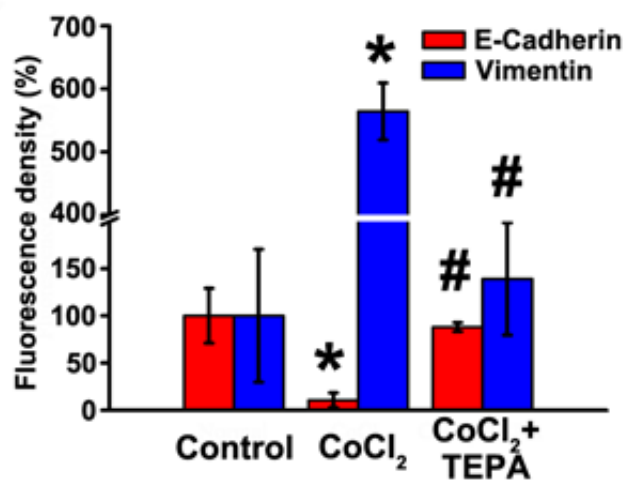

**Figure S1.** The fluorescence density of E-cadherin and vimentin were measured in each groups. Data was shown as mean  $\pm$  SD of three independent experiments.  $p < 0.05$  was considered statistically significant (\*compared to the control group and #compared to the CoCl<sub>2</sub> group).

Gene silence efficacy validation of *Ctrl* by western blot.

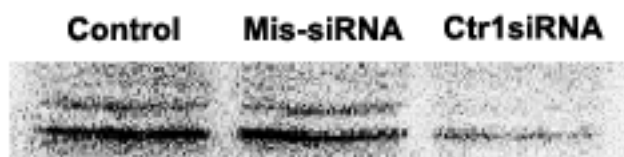

**Figure S2.** Gene silence efficacy of *Ctrl*. *Ctrl* expression was assayed by western blot after transfection and continued to culture for 24 h.

**Morphology of MCF-7 cells under TEPA treatment only.**

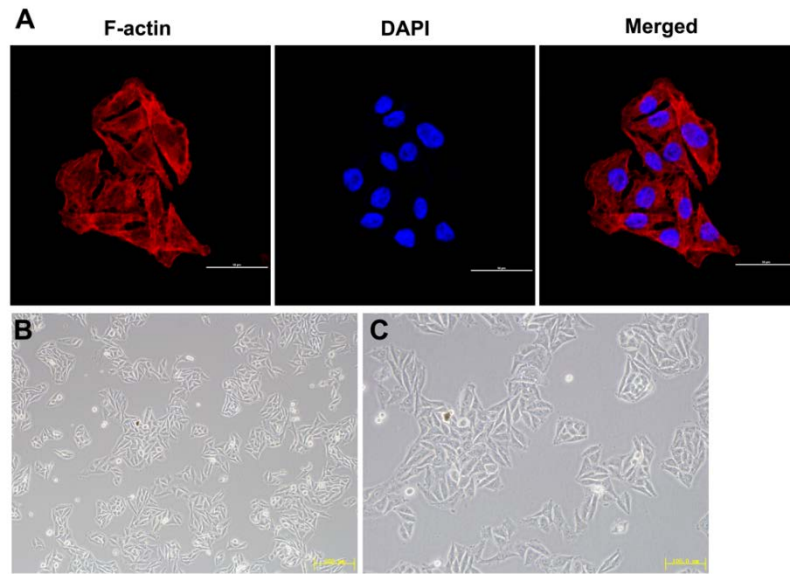

**Figure S3.** Morphology of MCF-7 cells under TEPA treatment only. **(A)** Spindle-shaped cells were not observed after TEPA treatment for 24 h. F-actin was stained by TRITC-phalloidin (red). Scale bar=50  $\mu$ m. **(B)** and **(C)** The morphology of MCF-7 cells were visualized by phase-contrast.
